# Supplementary material for: A novel 4-fluorobenzenetelluronic trimethyltin ester: synthesis, characterization and in vitro cytotoxicity assessment
Source: Royal Society of Chemistry journal article supplement (doi:10.1039/c6nj00288a), 2016-01-01
Supplement: c6nj00288a1.pdf [file c6nj00288a1.pdf]

## Electronic Supporting Information (ESI)

### A Novel 4-Fluorobenzenetelluronic Trimethyltin Ester: Synthesis, Characterization and in vitro Cytotoxic Assessment

Chunlin Ma,<sup>\*a</sup> Xinglong Liu,<sup>a</sup> Shuang Cheng,<sup>\*b</sup> Qianli Li,<sup>a</sup> and Rufen Zhang<sup>a</sup>

#### Figures in Supporting Information

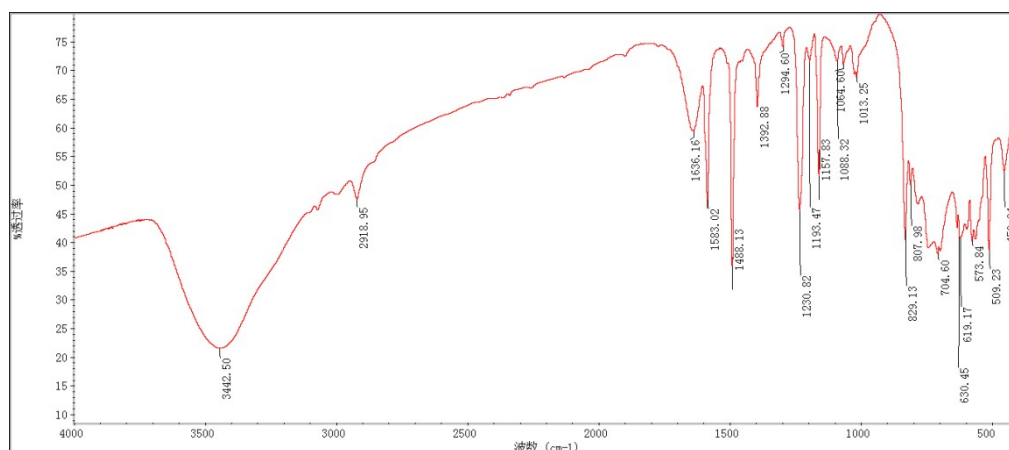

Fig. S1 The FT-IR spectrum of complex 1.

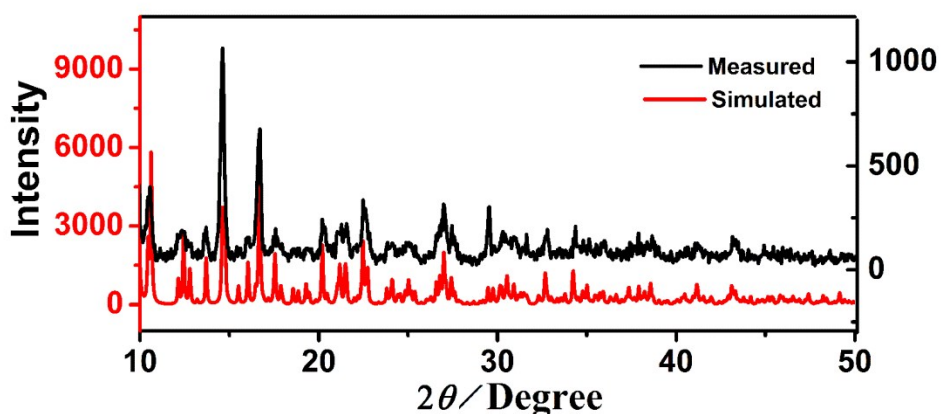

Fig. S2 PXRD patterns of complex 1

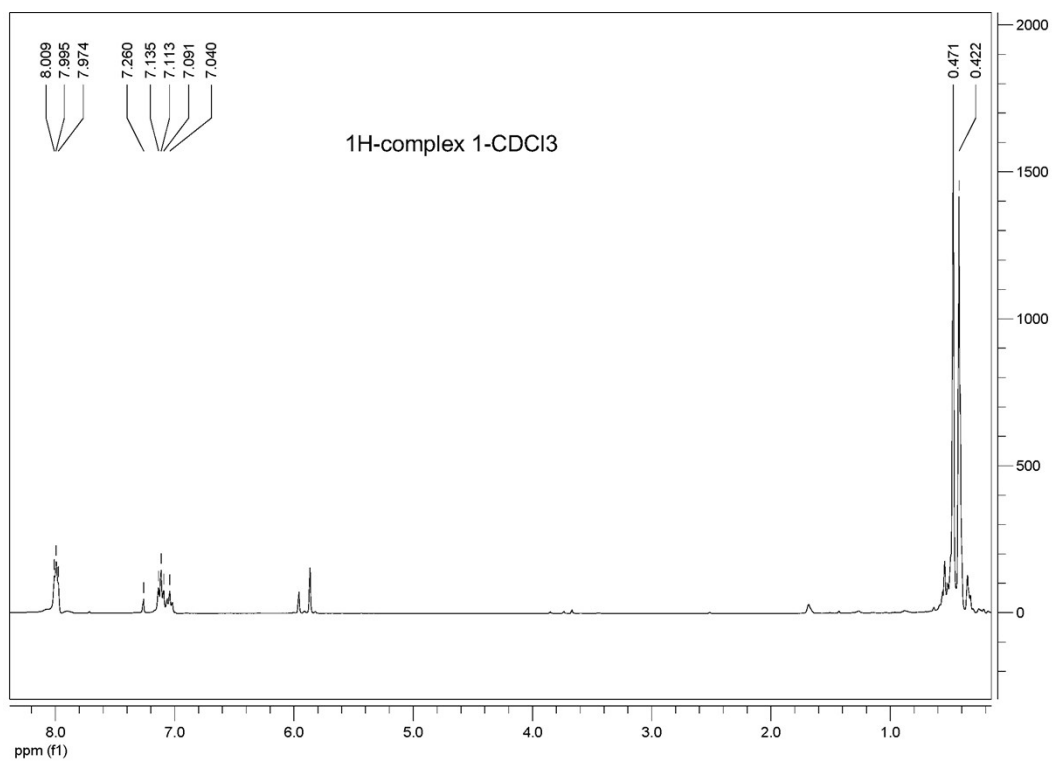

**Fig. S3** The <sup>1</sup>H NMR spectrum of complex **1** recorded in CDCl<sub>3</sub>

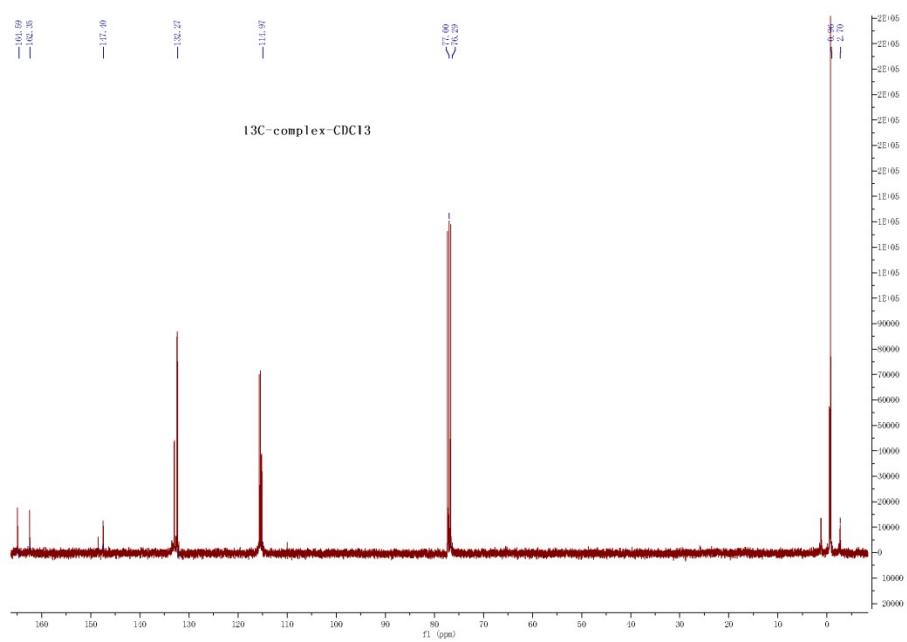

**Fig. S4** The <sup>13</sup>C NMR spectrum of complex **1** recorded in CDCl<sub>3</sub>

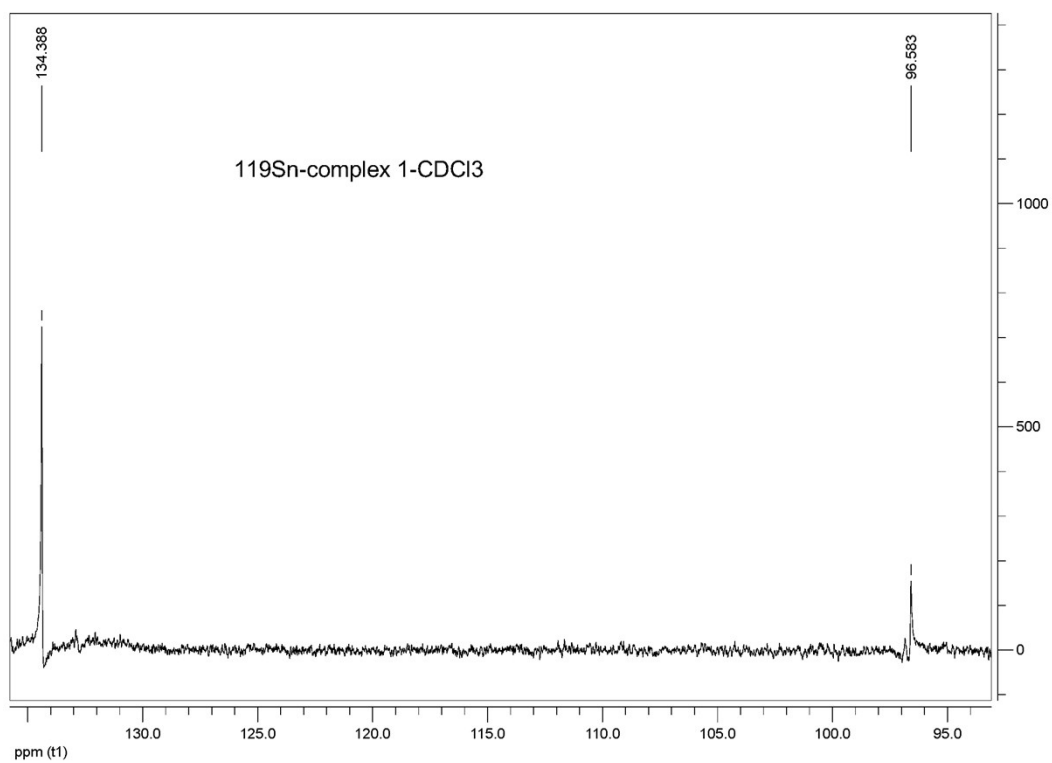

**Fig. S5** The  $^{119}\text{Sn}$  NMR spectrum of complex **1** recorded in  $\text{CDCl}_3$
